# Supplementary material for: Ubiquitin-like conjugation by bacterial cGAS enhances anti-phage defence
Source: PubMed Central journal article supplement (PMC10097602; doi:10.1038/s41586-023-05862-7), 2023-02-27
Supplement: 41586_2023_5862_MOESM1_ESM.pdf [file 41586_2023_5862_MOESM1_ESM.pdf]

---

**Supplementary information**

---

**Ubiquitin-like conjugation by bacterial cGAS enhances anti-phage defence**

---

In the format provided by the authors and unedited

Used in Fig. 1b

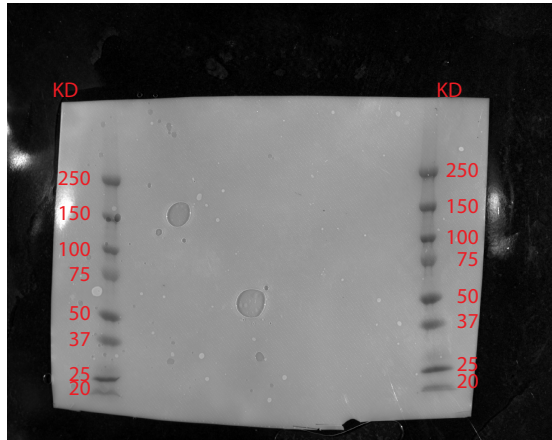

DTT (mM): - 1 10 100 - - - -  
H<sub>2</sub>O (mM): - - - - - 1 10 100

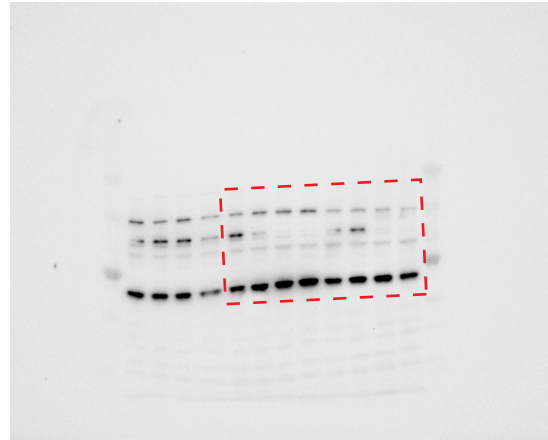

anti-Flag  
Flag-Cap2

Used in Fig. 1e

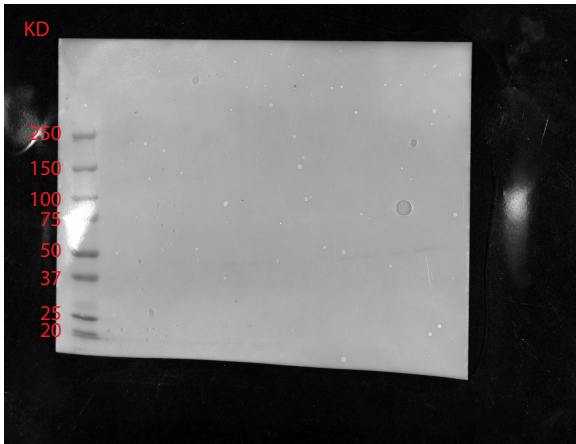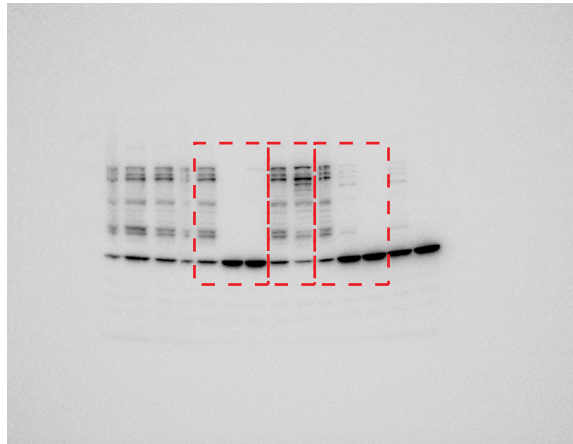

anti-Flag  
Flag-cGAS

WT Cap2 C493A/C496A  
Cap2 C91A WT Cap3 E38A  
WT cGAS G432A  
cGAS ΔG432

left right middle  
panel panel panel

Used in Fig. 1f

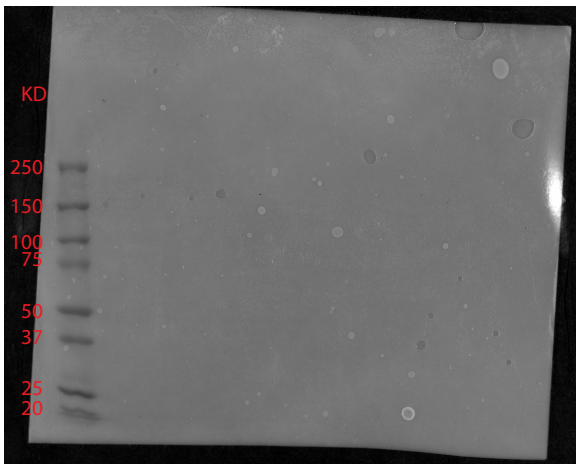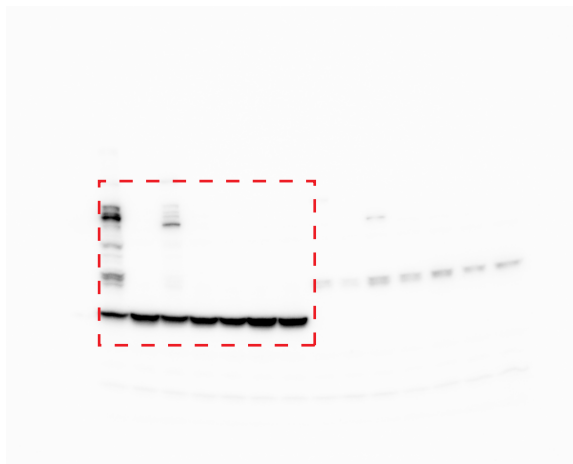

anti-Flag  
Flag-cGAS

WT cGAS ΔG432  
cGAS G432A  
cGAS G432S  
cGAS G432V  
cGAS G432R  
cGAS G432W

Used in Fig. 1g

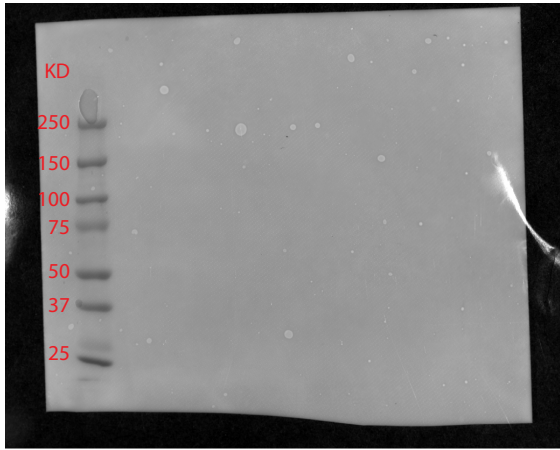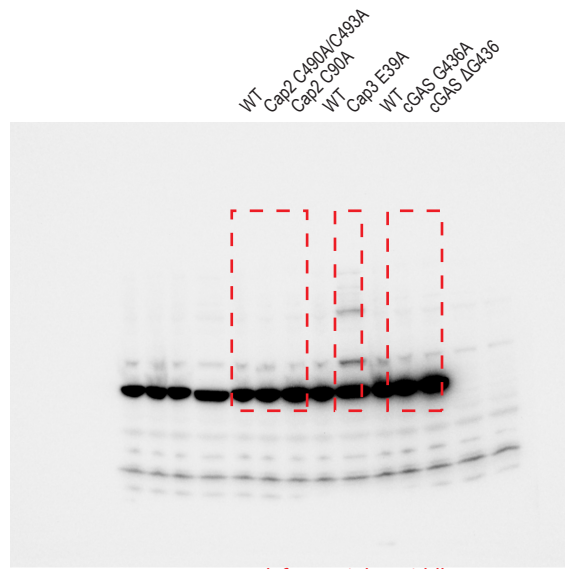

anti-Flag  
Flag-cGAS

left panel right middle panel panel

Used in Fig. 1h

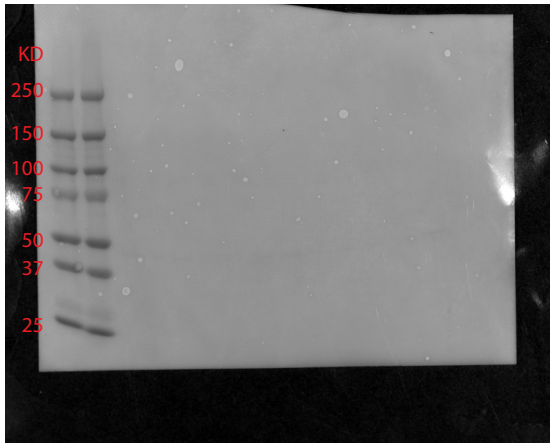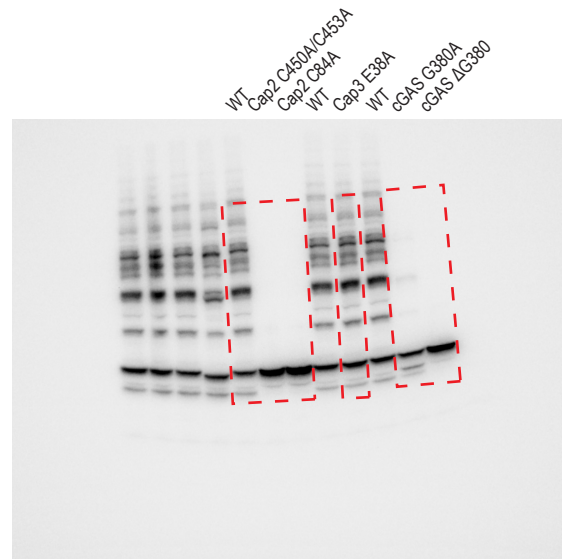

anti-Flag  
Flag-cGAS

left panel right middle panel panel

Used in Fig. 1i

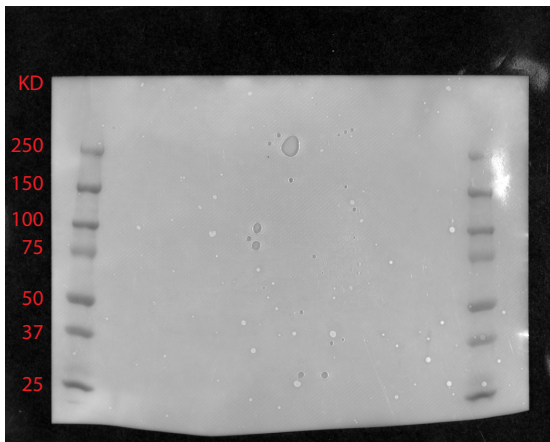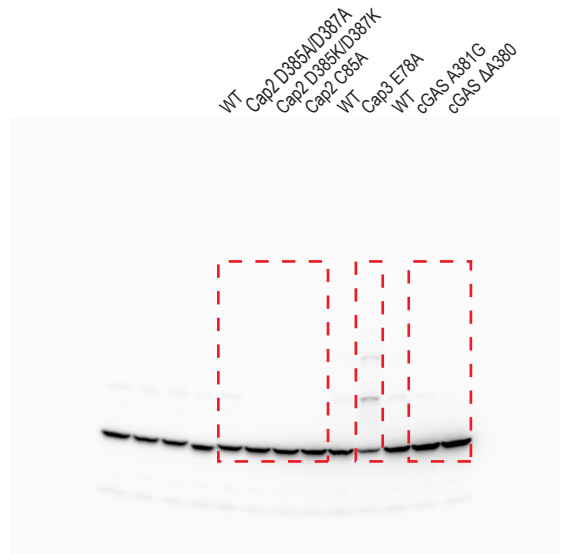

anti-Flag  
Flag-cGAS

left panel right middle panel panel

Used in Fig. 1j

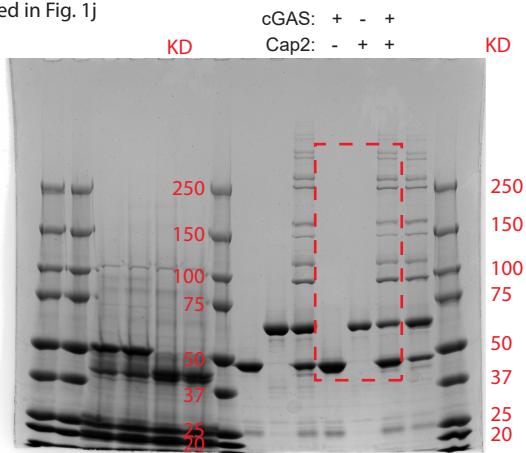

Used in Extended Data Fig. 1a

|                 |   |   |   |
|-----------------|---|---|---|
| Sumo-cGAS-cGAS: | - | + | + |
| Cap3:           | + | - | + |

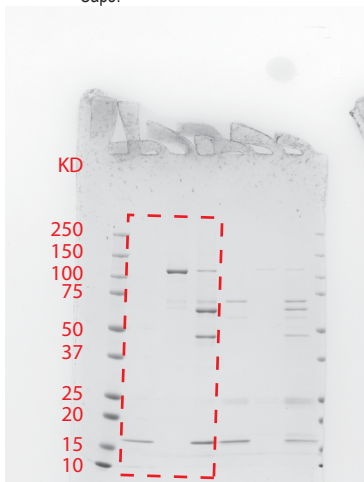

Used in Extended Data Fig. 1d

|          |   |   |
|----------|---|---|
| flag-IP: | + | + |
| Cap3:    | - | + |

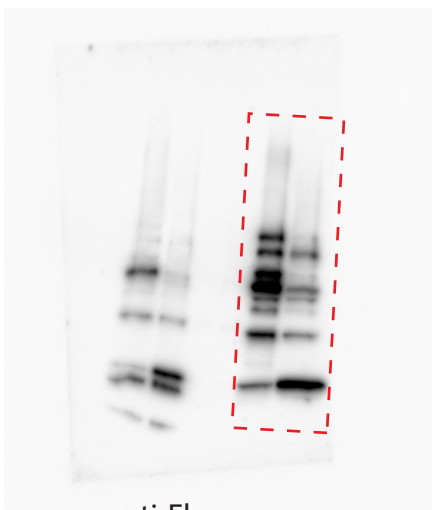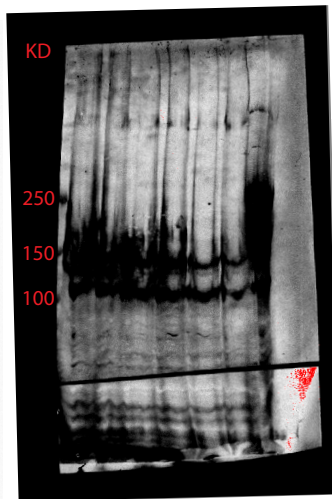

other half of membrane  
with visible mw markers

Used in Extended Data Fig. 1f

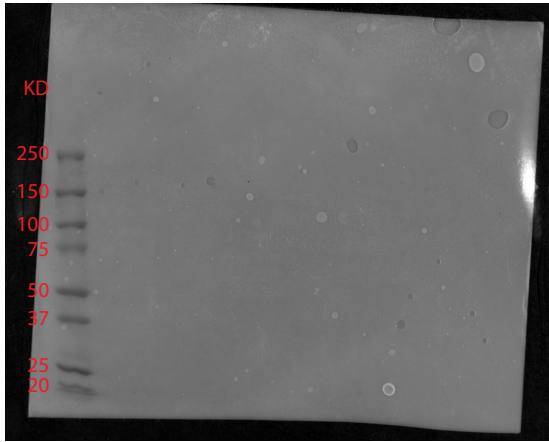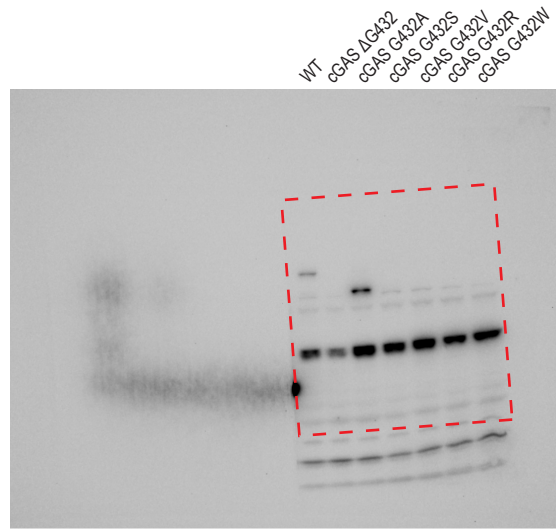

Used in Extended Data Fig. 1g

ATP (10 mM): - - + +  
MgCl<sub>2</sub> (20 mM): - + - +

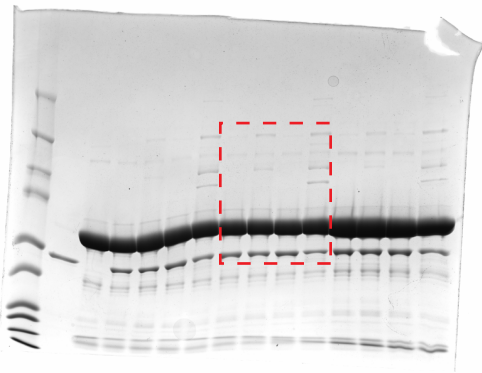

Used in Extended Data Fig. 3a

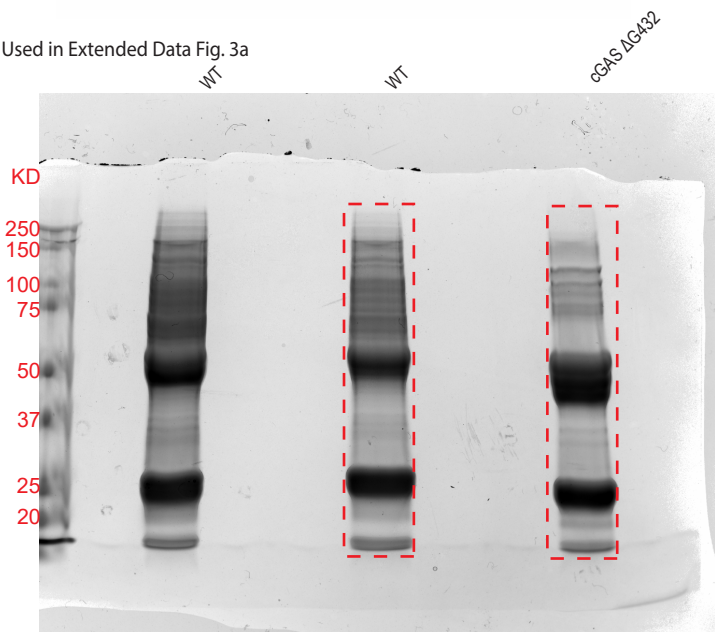

Supplementary Fig. 1 uncropped and unedited versions of all gels used in this study.

**Supplementary Table 1|** Top 20 cGAS conjugated proteins.

| Accession   | Description                                    | Gene        | Coverage [%] | # Peptides | MW [kDa] | Score Sequest HT | Abundance     |     | TMVSG sites |
|-------------|------------------------------------------------|-------------|--------------|------------|----------|------------------|---------------|-----|-------------|
|             |                                                |             |              |            |          |                  | $\Delta$ G432 | WT  |             |
| P06959      | Dihydrolipoyllysine-residue acetyltransferase  | aceF        | 91           | 74         | 66       | 6613             | 181           | 86  | 1           |
| P09373      | Formate acetyltransferase 1                    | pflB        | 93           | 86         | 85       | 5254             | 10            | 114 | 2           |
| <b>E1E2</b> | <b>ThiF family adenylyltransferase</b>         | <b>E1E2</b> | 90           | 75         | 67       | 3889             | 6             | 135 | 5           |
| P0A6F5      | 60 kDa chaperonin                              | groL        | 92           | 50         | 57       | 2781             | 2             | 169 | 2           |
| P07395      | Phenylalanine--tRNA ligase beta subunit        | pheT        | 85           | 73         | 87       | 2696             | 3             | 152 | 1           |
| P36683      | Aconitate hydratase 2                          | acnB        | 89           | 75         | 93       | 2528             | 5             | 141 | 1           |
| P0A8M3      | Threonine--tRNA ligase                         | thrS        | 85           | 64         | 74       | 1719             | 6             | 131 | 2           |
| P09152      | Respiratory nitrate reductase 1 alpha chain    | narG        | 83           | 88         | 140      | 1642             | 67            | 101 | 1           |
| P0A853      | Tryptophanase                                  | tnaA        | 89           | 42         | 53       | 1596             | 28            | 119 | 4           |
| P0A6M8      | Elongation factor G                            | fusA        | 81           | 49         | 78       | 1444             | 52            | 106 | 2           |
| P0CE48      | Elongation factor Tu 2                         | tufB        | 86           | 29         | 43       | 1149             | 6             | 110 | 1           |
| P0A9B2      | Glyceraldehyde-3-phosphate dehydrogenase A     | gapA        | 92           | 39         | 36       | 1037             | 29            | 125 | 4           |
| P05055      | Polyribonucleotide nucleotidyltransferase      | pnp         | 69           | 48         | 77       | 960              | 124           | 94  | 1           |
| P08839      | Phosphoenolpyruvate-protein phosphotransferase | ptsI        | 86           | 48         | 64       | 752              | 15            | 94  | 1           |
| P0A799      | Phosphoglycerate kinase                        | pgk         | 94           | 37         | 41       | 613              | 4             | 126 | 2           |
| P0A9C5      | Glutamine synthetase                           | glnA        | 85           | 34         | 52       | 612              | 2             | 148 | 1           |
| P00961      | Glycine--tRNA ligase beta subunit              | glyS        | 85           | 58         | 77       | 605              | 51            | 113 | 1           |
| P0A6P9      | Enolase                                        | eno         | 86           | 36         | 46       | 597              | 1             | 144 | 1           |
| P0A6T1      | Glucose-6-phosphate isomerase                  | pgi         | 80           | 44         | 62       | 576              | 1             | 128 | 2           |
| P00957      | Alanine--tRNA ligase                           | alaS        | 74           | 57         | 96       | 546.36           | 31            | 138 | 1           |

**Supplementary Table 2| 20 most enriched cGAS conjugated proteins in cells infected with phage T4.**

| Description                                                                                                         | Sum PEP Score | Coverage [%] | Abundance Ratio: (T4 infected) / (Uninfected) | Found in Sample: Uninfected | Found in Sample: T4 infected | Modifications     |
|---------------------------------------------------------------------------------------------------------------------|---------------|--------------|-----------------------------------------------|-----------------------------|------------------------------|-------------------|
| Uncharacterized 9.5 kDa protein in dexA-dda intergenic region OS=Enterobacteria phage T4 OX=10665 GN=y00H PE=4 SV=1 | 22.617        | 70           | 100                                           | Not Found                   | High                         | TMVSG [K5]        |
| Fibrin OS=Enterobacteria phage T4 OX=10665 GN=wac PE=1 SV=5                                                         | 111.34        | 69           | 21.028                                        | High                        | High                         | TMVSG [K100]      |
| 50S ribosomal protein L4 OS=Escherichia coli (strain K12) GN=rpL4 PE=1 SV=1                                         | 64.668        | 59           | 18.773                                        | High                        | High                         | TMVSG [K6]        |
| 50S ribosomal protein L9 OS=Escherichia coli (strain K12) GN=rpL9 PE=1 SV=1                                         | 48.507        | 78           | 12.396                                        | High                        | High                         | TMVSG [K22]       |
| Protein-export protein SecB OS=Escherichia coli (strain K12) GN=secB PE=1 SV=1                                      | 27.533        | 54           | 4.542                                         | High                        | High                         | TMVSG [K19]       |
| Glycerol kinase OS=Escherichia coli (strain K12) GN=glpK PE=1 SV=2                                                  | 220.956       | 72           | 2.741                                         | High                        | High                         | TMVSG [K143]      |
| Citrate synthase OS=Escherichia coli (strain K12) GN=gltA PE=1 SV=1                                                 | 181.654       | 85           | 2.078                                         | High                        | High                         | TMVSG [K38]       |
| 60 kDa chaperonin OS=Escherichia coli (strain K12) GN=groL PE=1 SV=2                                                | 527.371       | 90           | 1.983                                         | High                        | High                         | TMVSG [K7]        |
| Lipid A export ATP-binding/permease protein MsbA OS=Escherichia coli (strain K12) GN=msbA PE=1 SV=1                 | 5.504         | 5            | 1.943                                         | Peak Found                  | High                         | TMVSG [K528]      |
| 3-oxoacyl-[acyl-carrier-protein] synthase 2 OS=Escherichia coli (strain K12) GN=fabF PE=1 SV=2                      | 62.461        | 65           | 1.832                                         | High                        | High                         | TMVSG [K49]       |
| Ribosomal protein S12 methyltransferase RimO OS=Escherichia coli (strain K12) GN=rpmO PE=1 SV=1                     | 46.233        | 37           | 1.752                                         | High                        | High                         | TMVSG [K19]       |
| Alkyl hydroperoxide reductase subunit C OS=Escherichia coli (strain K12) GN=ahpC PE=1 SV=2                          | 171.942       | 90           | 1.603                                         | High                        | High                         | TMVSG [K17]       |
| Glycine cleavage system H protein OS=Escherichia coli (strain K12) GN=gcvH PE=1 SV=2                                | 10.867        | 27           | 1.542                                         | High                        | High                         | TMVSG [K12]       |
| Galactitol-specific phosphotransferase enzyme IIA component OS=Escherichia coli (strain K12) GN=gatA PE=4 SV=1      | 48.243        | 90           | 1.41                                          | High                        | High                         | TMVSG [K29]       |
| Acetyl-coenzyme A carboxylase carboxyl transferase subunit alpha OS=Escherichia coli (strain K12) GN=accA PE=1 SV=2 | 57.406        | 56           | 1.303                                         | High                        | High                         | TMVSG [K53]       |
| Elongation factor Tu 1 OS=Escherichia coli (strain K12) GN=tufA PE=1 SV=1                                           | 216.33        | 90           | 1.294                                         | High                        | High                         | TMVSG [K38; K177] |
| Elongation factor Tu 2 OS=Escherichia coli (strain K12) GN=tufB PE=1 SV=1                                           | 216.33        | 90           | 1.294                                         | High                        | High                         | TMVSG [K38; K177] |
| Lactaldehyde dehydrogenase OS=Escherichia coli (strain K12) GN=aldA PE=1 SV=2                                       | 138.001       | 76           | 1.288                                         | High                        | High                         | TMVSG [K356]      |
| Lysine-tRNA ligase OS=Escherichia coli (strain K12) GN=lysS PE=1 SV=2                                               | 219.952       | 77           | 1.116                                         | High                        | High                         | TMVSG [K82]       |
| Bifunctional purine biosynthesis protein PurH OS=Escherichia coli (strain K12) GN=purH PE=1 SV=1                    | 72.007        | 45           | 1.069                                         | High                        | High                         | TMVSG [K17]       |
